# Supplementary material
Source: PubMed Central journal article supplement (PMC3850245)

# Reinventing lithium therapeutics by crystal engineering of novel ionic cocrystals

*Adam J. Smith<sup>1,†</sup>, Seol-Hee Kim<sup>1</sup>, Naga K. Duggirala<sup>3</sup>, Jingji Jin<sup>2</sup>, Lukasz Wojtas<sup>3</sup>, Jared Ehrhart<sup>4</sup>, Brian Giunta<sup>2</sup>, Jun Tan<sup>4</sup>, Michael J. Zaworotko<sup>3</sup>, R. Douglas Shytle<sup>1</sup>*

<sup>1</sup>Center of Excellence for Aging and Brain Repair, Department of Neurosurgery and Brain Repair, Morsani College of Medicine, University of South Florida, Tampa, FL

<sup>2</sup>Neuroimmunology Laboratory, Department of Psychiatry and Behavioral Neurosciences, Morsani College of Medicine, University of South Florida, Tampa, FL

<sup>3</sup>Department of Chemistry, College of Arts and Sciences, University of South Florida, Tampa, FL

<sup>4</sup>Rashid Laboratory for Developmental Neurobiology, Silver Child Development Center, Department of Psychiatry and Behavioral Neurosciences, Morsani College of Medicine, University of South Florida, Tampa, FL

<sup>†</sup>Dr. Adam Smith, Center of Excellence for Aging and Brain Repair, MDC78, Department of Neurosurgery and Brain Repair, University of South Florida, College of Medicine, Tampa, FL, USA 33612, Phone: 813-974-1452; Fax: 813-974-3078; Email: [asmith1@health.usf.edu](mailto:asmith1@health.usf.edu)

## **Supplementary information:**

Additional characterization data for the reported ICCs of lithium

| <b><u>Crystalline form</u></b> | <b><u>Page No.</u></b> |
|--------------------------------|------------------------|
| LNAPRO                         | S2                     |
| LISPRO                         | S3                     |

# LNAPRO

Supplementary Figure S1: DSC of LNAPRO (TA instrument 2920)

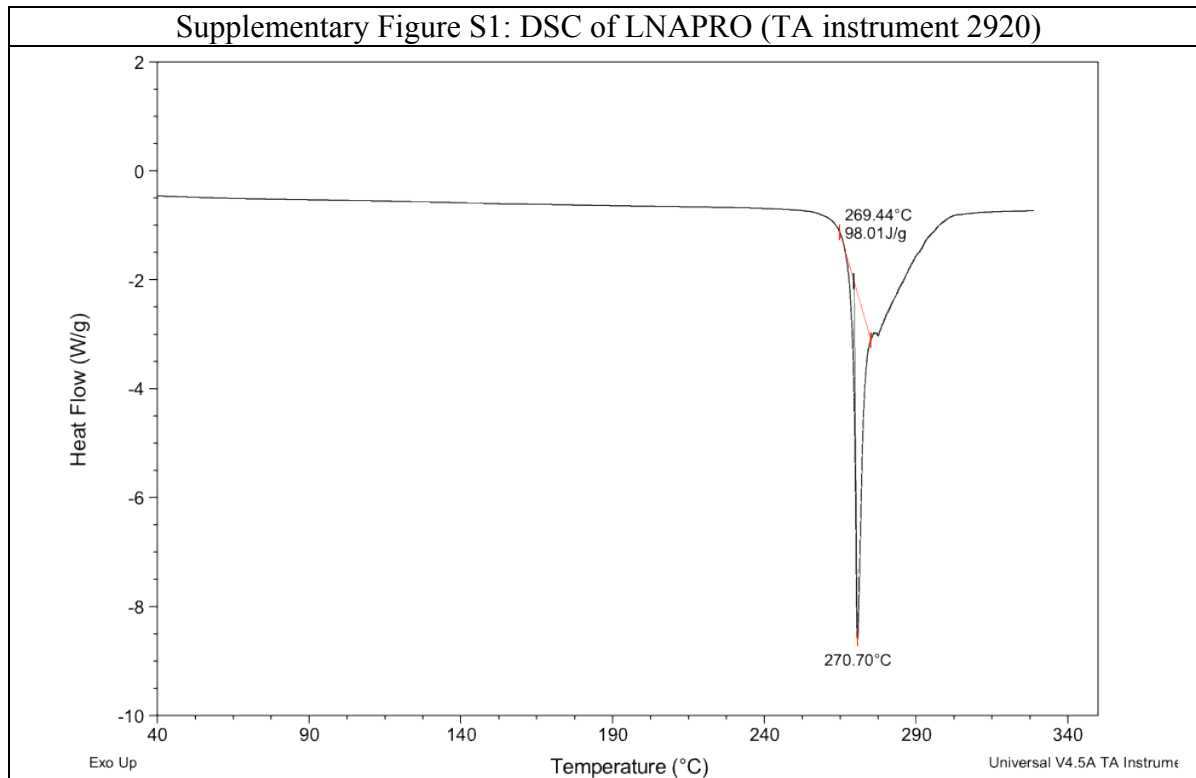

Supplementary Figure S2: LNAPRO Structure With Probability Ellipsoids

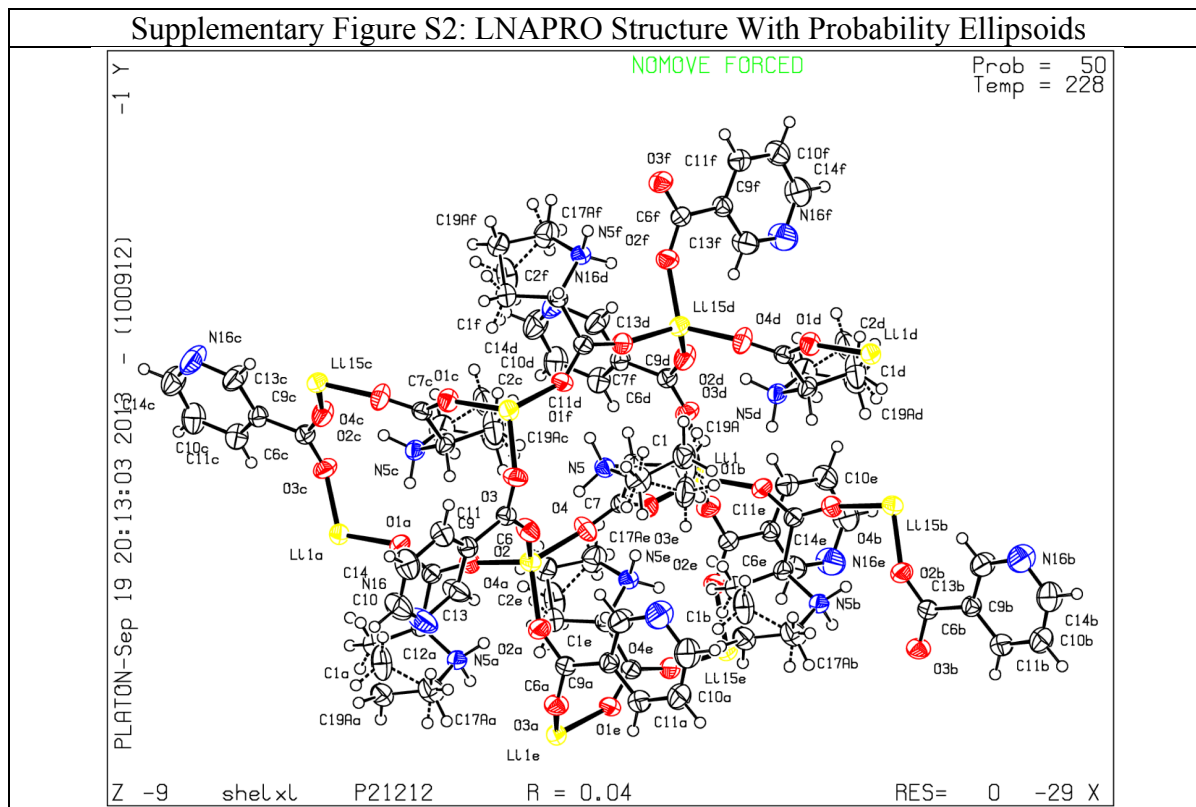

# LISPRO

Supplementary Figure S3: DSC of LISPRO (TA instrument 2920)

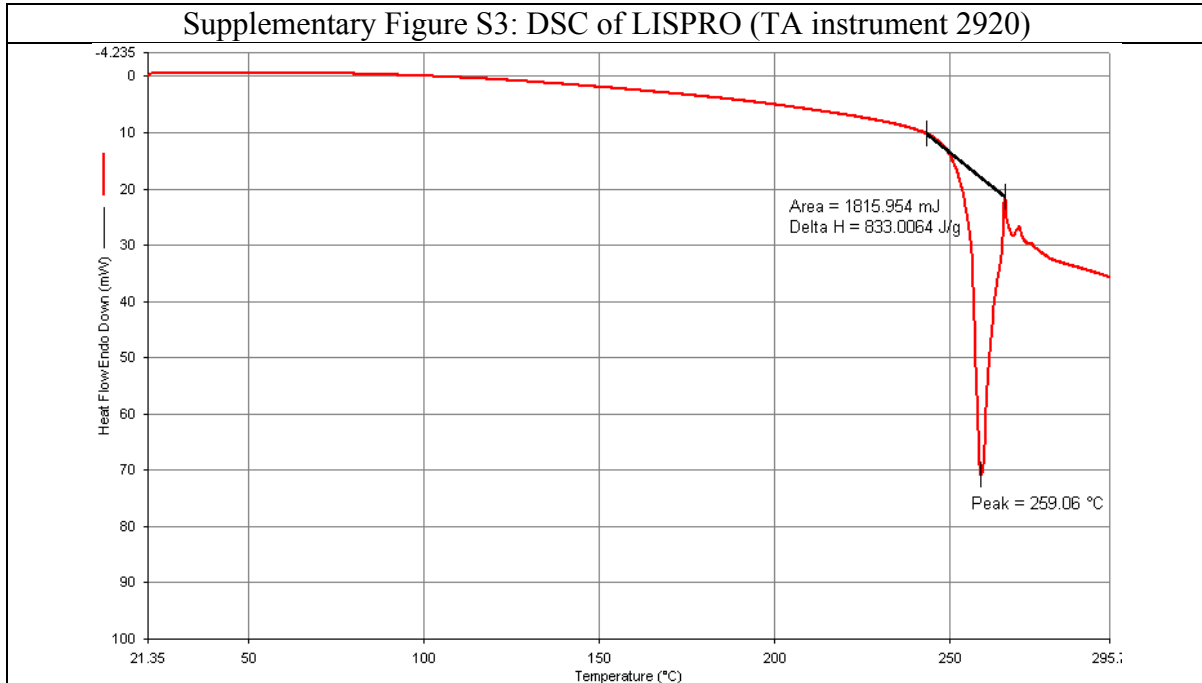

Supplementary Figure S4: LISPRO Structure With Probability Ellipsoids

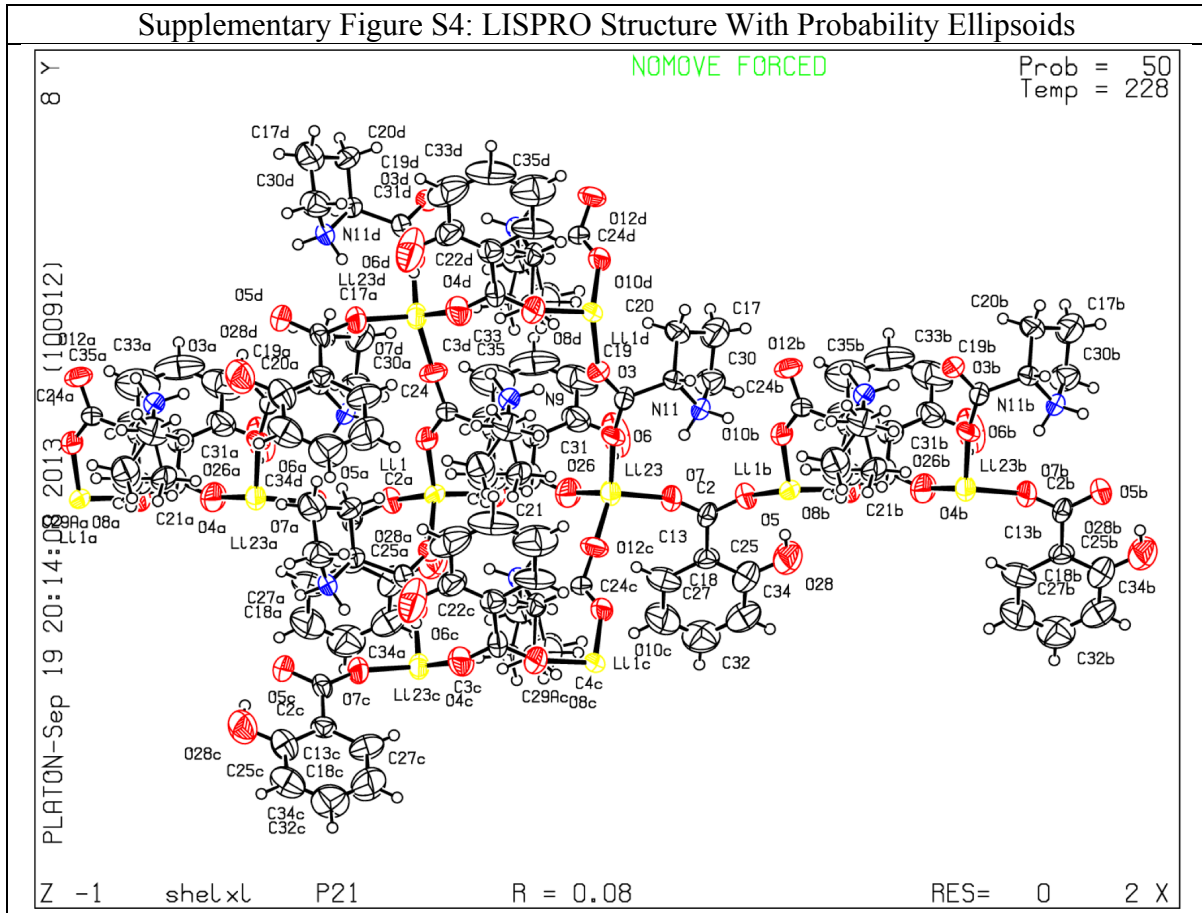

Supplementary Figure S5: AAS Purity Verification of LISPRO and LIS

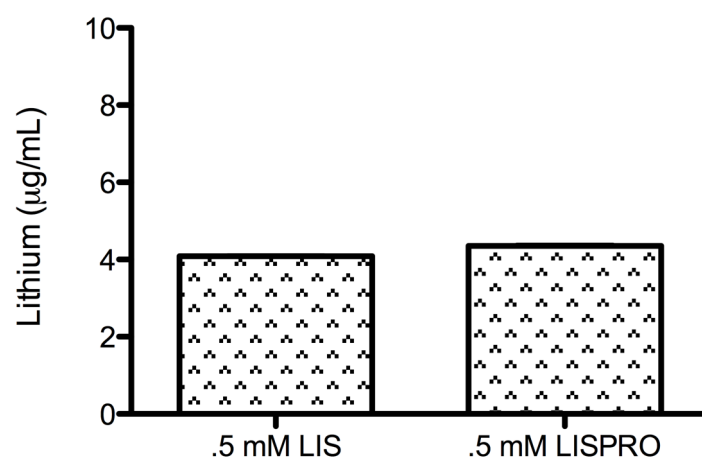

Supplement: mp400571a_si_001.pdf [file mp400571a_si_001.pdf]
